# Supplementary material for: Post-derivative TLC densitometric stability indicating assay for mesterolone and quantum chemical calculations
Source: Royal Society of Chemistry journal article supplement (doi:10.1039/c5ay02003d), 2015-01-01
Supplement: c5ay02003d1.pdf [file c5ay02003d1.pdf]

## **Supplementary Material**

**Supplementary file 1.** Precision and accuracy for quality control standard of mesterolone

**Supplementary file 2.** Robustness testing (n = 6)

**Supplementary file 3.** Recovery studies (n = 6)

**Supplementary file 1.** Precision and accuracy for quality control standard of mesterolone

| Conc.<br>(ng) | Analyst 1             |        |      |                      |        |      | Analyst 2            |             |      |
|---------------|-----------------------|--------|------|----------------------|--------|------|----------------------|-------------|------|
|               | Intra-day             |        |      | Inter-day            |        |      | Found*<br>(ng)       | R.S.D.<br>% | S.E. |
|               | Found*                | R.S.D. | S.E. | Found*               | R.S.D. | S.E. |                      |             |      |
| 300           | 304.57 ± 2.05<br>(ng) | 0.67   | 1.18 | 302.37± 3.01<br>(ng) | 0.99   | 1.73 | 300.57± 1.25<br>(ng) | 0.41        | 0.72 |
| 500           | 499.43 ± 1.29         | 0.25   | 0.74 | 503.45± 2.07         | 0.41   | 1.19 | 500.62± 0.68         | 0.13        | 0.39 |
| 700           | 702.64 ± 1.33         | 0.18   | 0.76 | 700.52± 1.44         | 0.20   | 0.83 | 701.06± 0.51         | 0.07        | 0.29 |

\*Values are mean of n = 6.

**Supplementary file 2. Robustness testing (n = 6)**

| Standard level                  | Mobile phase composition  |            | Nature of TLC               |            | Time from spotting to chromatography |            | Time from chromatography to staining |            | Time for staining         |            | Time from staining to scanning |            |
|---------------------------------|---------------------------|------------|-----------------------------|------------|--------------------------------------|------------|--------------------------------------|------------|---------------------------|------------|--------------------------------|------------|
| Amount (ng/spot <sup>-1</sup> ) | Amount detected (ng ± SD) | R.S.D. (%) | Amount detected (ng ± S.D.) | R.S.D. (%) | Amount detected (ng ± SD)            | R.S.D. (%) | Amount detected (ng ± SD)            | R.S.D. (%) | Amount detected (ng ± SD) | R.S.D. (%) | Amount detected (ng ± SD)      | R.S.D. (%) |
| 300                             | 301.2 ± 2.25              | 0.74       | 300.2 ± 2.61                | 0.86       | 303.29 ± 3.47                        | 1.14       | 298.17 ± 2.31                        | 0.77       | 302.53 ± 2.07             | 0.68       | 302.14 ± 3.5                   | 1.16       |
| 500                             | 505.02 ± 3.86             | 0.76       | 503.6 ± 1.95                | 0.38       | 498.52 ± 2.50                        | 0.50       | 502.83 ± 2.35                        | 0.46       | 506.13 ± 2.13             | 0.42       | 502.43 ± 2.33                  | 0.46       |
| 700                             | 705.23 ± 2.48             | 0.35       | 699.46 ± 1.51               | 0.21       | 704.04 ± 1.57                        | 0.22       | 700.65 ± 1.64                        | 0.23       | 706.45 ± 2.52             | 0.35       | 703.25 ± 1.27                  | 0.18       |

**Supplementary file 3.** Recovery studies (n = 6)

| Sample | Standard spiked<br>% | Theoretical ng<br>spot <sup>-1</sup> | Mean recovery<br>% | RSD % |
|--------|----------------------|--------------------------------------|--------------------|-------|
| M1     | 50                   | 351.5                                | 98.3               | 0.45  |
|        | 100                  | 468.7                                | 99.2               | 0.56  |
|        | 150                  | 585.9                                | 97.5               | 0.32  |
